# Supplementary material for: Ambient Air Pollution Exposure Association with Anaemia Prevalence and Haemoglobin Levels in Chinese Older Adults
Source: PubMed Central journal article supplement (PMC7246731; doi:10.3390/ijerph17093209), 2020-05-05
Supplement: ijerph-17-03209-s001.pdf [file ijerph-17-03209-s001.pdf]

# Supplementary Materials

**Table S1.** Results of 10-fold cross-validation for PM<sub>1</sub>, PM<sub>2.5</sub>, PM<sub>10</sub> and NO<sub>2</sub>.

| Pollutants        | Daily Model       |                        | Annual Averages   |                        |
|-------------------|-------------------|------------------------|-------------------|------------------------|
|                   | CV R <sup>2</sup> | RMSE                   | CV R <sup>2</sup> | RMSE                   |
| PM <sub>1</sub>   | 55%               | 20.5 µg/m <sup>3</sup> | 75%               | 8.8 µg/m <sup>3</sup>  |
| PM <sub>2.5</sub> | 83%               | 18.1 µg/m <sup>3</sup> | 86%               | 6.9 µg/m <sup>3</sup>  |
| PM <sub>10</sub>  | 78%               | 31.5 µg/m <sup>3</sup> | 81%               | 14.4 µg/m <sup>3</sup> |
| NO <sub>2</sub>   | 64%               | 12.4 µg/m <sup>3</sup> | 72%               | 6.5 µg/m <sup>3</sup>  |

RMSE: Root mean square error; CV: cross-validation. PM<sub>10</sub>, particulate matter with an aerodynamic diameter less than or equal to 10 µm; PM<sub>2.5</sub>, particulate matter with an aerodynamic diameter less than or equal to 2.5 µm; PM<sub>1</sub>, particulate matter with an aerodynamic diameter less than or equal to 1 µm and NO<sub>2</sub> nitrogen dioxide.

**Table S2.** Annual average concentrations and pair wise correlations of air pollutants.

| Pollutants                             | Spearman Correlation Coefficients (p value) |                    |                    |                    |
|----------------------------------------|---------------------------------------------|--------------------|--------------------|--------------------|
|                                        | PM <sub>10</sub>                            | PM <sub>2.5</sub>  | PM <sub>1</sub>    | NO <sub>2</sub>    |
| PM <sub>10</sub> (µg/m <sup>3</sup> )  | 1                                           | 0.9248 (P < 0.001) | 0.2835 (P < 0.001) | 0.6146 (P < 0.001) |
| PM <sub>2.5</sub> (µg/m <sup>3</sup> ) |                                             | 1                  | 0.5191 (P < 0.001) | 0.8182 (P < 0.001) |
| PM <sub>1</sub> (µg/m <sup>3</sup> )   |                                             |                    | 1                  | 0.7928 (P < 0.001) |
| NO <sub>2</sub> (µg/m <sup>3</sup> )   |                                             |                    |                    | 1                  |

PM<sub>10</sub>, particulate matter with an aerodynamic diameter less than or equal to 10 µm; PM<sub>2.5</sub>, particulate matter with an aerodynamic diameter less than or equal to 2.5 µm; PM<sub>1</sub>, particulate matter with an aerodynamic diameter less than or equal to 1 µm and NO<sub>2</sub> nitrogen dioxide.

**Table S3.** Characteristics of participants with haemoglobin blood samples data and without blood sample (BS) data.

| Characteristics                        | Participants without BS | Participants with BS    | Total<br>(N = 12,950) | p-value |
|----------------------------------------|-------------------------|-------------------------|-----------------------|---------|
|                                        | Consent<br>(N = 2756)   | Consent<br>(N = 10,611) |                       |         |
| <b>Age (±SD)</b>                       | 63.7 (9.3)              | 63.0 (9.3)              | 63.2 (9.4)            | 0.001   |
| <b>Sex</b>                             |                         |                         |                       | <0.001  |
| Female (%)                             | 1554 (21.9)             | 5539 (78.1)             | 7093                  |         |
| Male (%)                               | 1202 (19.2)             | 5072 (80.8)             | 6274                  |         |
| <b>Smoking</b>                         |                         |                         |                       | <0.001  |
| Never smoker (%)                       | 1702 (19.7)             | 6941 (80.3)             | 8643                  |         |
| Ever smoker (%)                        | 712 (16.5)              | 3610 (83.5)             | 4322                  |         |
| <b>Alcohol</b>                         |                         |                         |                       | 0.864   |
| No (%)                                 | 1671 (18.7)             | 7283 (81.3)             | 8954                  |         |
| Yes (%)                                | 739 (18.5)              | 3252 (81.5)             | 3991                  |         |
| <b>BMI (±SD)</b>                       | 23.9 (4.0)              | 24.0 (5.1)              | 24(5.0)               |         |
| <b>Physical Activity</b>               |                         |                         |                       | <0.001  |
| Low level (%)                          | 869 (20.8)              | 3313 (79.2)             | 4182                  |         |
| Moderate level (%)                     | 709 (19.5)              | 2936 (80.5)             | 3645                  |         |
| High level (%)                         | 834 (16.2)              | 4303 (83.8)             | 5137                  |         |
| <b>Education</b>                       |                         |                         |                       | <0.001  |
| No school (%)                          | 1038 (18.5)             | 4562 (81.5)             | 5600                  |         |
| Primary (%)                            | 4311 (16.6)             | 217 (83.4)              | 2602                  |         |
| Middle (%)                             | 651 (24.0)              | 2057(76.0)              | 2708                  |         |
| Higher education (%)                   | 615 (25.8)              | 1770 (74.2)             | 2385                  |         |
| <b>Fruit and Vegetable consumption</b> |                         |                         |                       | 0.009   |
| Insufficient intake (%)                | 1307 (21.6)             | 4733 (78.4)             | 6040                  |         |
| Sufficient intake (%)                  | 1449 (19.8)             | 5878 (80.2)             | 7327                  |         |

| <b>Fuel used at home</b>      |             |             |      | <0.001 |
|-------------------------------|-------------|-------------|------|--------|
| Clean (%)                     | 1798 (24.4) | 5580 (75.6) | 7378 |        |
| Unclean (%)                   | 946 (16.0)  | 4969 (84.0) | 5915 |        |
| <b>Total Household income</b> |             |             |      | <0.001 |
| ≤15,000 (%)                   | 1234 (18.5) | 5442 (81.5) | 6676 |        |
| >15,000 (%)                   | 1485 (23.2) | 4907 (76.8) | 6392 |        |
| <b>Location of residence</b>  |             |             |      | <0.001 |
| Urban (%)                     | 1061 (15.6) | 5739 (84.4) | 6800 |        |
| Rural (%)                     | 1695 (25.8) | 4872(74.2)  | 6567 |        |

**Table S4.** Associations between 3-year pollutant moving averages and haemoglobin, by participant characteristics.

| Characteristics           | PM <sub>10</sub> | PM <sub>2.5</sub> | PM <sub>1</sub>  | NO <sub>2</sub> |
|---------------------------|------------------|-------------------|------------------|-----------------|
|                           | β ± SE           | β ± SE            | β ± SE           | β ± SE          |
| Sex                       |                  |                   |                  |                 |
| Male                      | -0.71 ± 0.09     | -0.80 ± 0.12      | -0.61 ± 0.09     | -1.61 ± 0.10    |
| Female                    | -0.63 ± 0.08     | -0.74 ± 0.11      | -0.72 ± 0.08     | -1.84 ± 0.10    |
| Interaction p-value       | 0.29             | 0.46              | 0.28             | 0.90            |
| Age                       |                  |                   |                  |                 |
| Below Median (70 years)   | -0.65 ± 0.09     | -0.77 ± 0.12      | -0.64 ± 0.08     | -1.65 ± 0.10    |
| Above Median (70 years)   | -0.66 ± 0.09     | -0.70 ± 0.11      | -0.63 ± 0.09     | -1.69 ± 0.10    |
| Interaction p-value       | 0.32             | 0.80              | 0.61             | 0.360           |
| History of COPD/Emphysema |                  |                   |                  |                 |
| Yes                       | -0.66 ± 0.21     | -0.75 ± 0.27      | -0.66 ± 0.15     | -1.64 ± 0.28    |
| No                        | -0.64 ± 0.06     | -0.72 ± 0.08      | -0.62 ± 0.06     | -1.68 ± 0.07    |
| Interaction p-value       | 0.74             | 0.71              | 0.96             | 0.81            |
| Smoker                    |                  |                   |                  |                 |
| Current tobacco use       | -0.78 ± 0.10     | -0.95 ± 0.14      | -0.80 ± 0.10     | -1.87 ± 0.12    |
| No current tobacco use    | -0.61 ± 0.08     | -0.67 ± 0.10      | -0.58 ± 0.07     | -1.65 ± 0.09    |
| Interaction p-value       | <b>0.003</b>     | 0.05              | <b>0.006</b>     | 0.12            |
| Alcohol                   |                  |                   |                  |                 |
| Ever                      | -0.74 ± 0.12     | -0.79 ± 0.16      | -0.69 ± 0.11     | -1.69 ± 0.12    |
| Never                     | -0.60 ± 0.07     | -0.71 ± 0.09      | -0.61 ± 0.07     | -1.66 ± 0.09    |
| Interaction p-value       | 0.08             | 0.30              | <b>&lt;0.001</b> | <b>0.01</b>     |
| Total household income    |                  |                   |                  |                 |
| ≤15000                    | -0.92 ± 0.08     | -1.21 ± 0.11      | -0.85 ± 0.08     | -1.96 ± 0.10    |
| >15000                    | -0.43 ± 0.12     | -0.36 ± 0.15      | -0.12 ± 0.10     | -1.11 ± 0.12    |
| Interaction p-value       | 0.06             | 0.99              | 0.16             | 0.29            |
| Region                    |                  |                   |                  |                 |
| South                     | -0.04 ± 0.20     | 0.25 ± 0.22       | 0.20 ± 0.10      | -1.69 ± 0.98    |
| North                     | -0.29 ± 0.06     | -0.52 ± 0.08      | 0.19 ± 0.07      | -0.30 ± 0.10    |
| Interaction p-value       | <0.001           | <0.001            | <0.001           | <0.001          |

PM<sub>10</sub>, particulate matter with an aerodynamic diameter less than or equal to 10 µm; PM<sub>2.5</sub>, particulate matter with an aerodynamic diameter less than or equal to 2.5 µm; PM<sub>1</sub>, particulate matter with an aerodynamic diameter less than or equal to 1 µm and NO<sub>2</sub> nitrogen dioxide. COPD: chronic obstructive pulmonary disease.

**Table S5.** Sensitivity analysis of the association between anaemia prevalence and moving averages of pollutants.

| Model Number            | NO <sub>2</sub>   | PM <sub>1</sub>   | PM <sub>2.5</sub> | PM <sub>10</sub>  |
|-------------------------|-------------------|-------------------|-------------------|-------------------|
| † Model 1 <sup>a</sup>  | 1.51 (1.42–1.61)  | 1.26 (1.17–1.36)  | 1.24 (1.17–1.32)  | 1.14 (1.10–1.19)  |
| †† Model 2 <sup>b</sup> | 1.40(1.33, 1.48)  | 1.12 (1.05, 1.19) | 1.11 (1.05, 1.16) | 1.04 (1.01, 1.07) |
| †† Model 3 <sup>c</sup> | 1.42 (1.35, 1.50) | 1.15 (1.09, 1.23) | 1.12 (1.06, 1.18) | 1.05 (1.02, 1.08) |

<sup>a</sup> Excluding participants (n = 3692) who had respiratory or cardiovascular comorbidity. <sup>b</sup> using 1-year average IQR increase. <sup>c</sup> using 5 years average IQR increase. † Model includes pollutant, age, sex, tobacco use, physical activity, education, body mass index (BMI), alcohol, place of residence,

household income, type of indoor fuel use, daily fruit and vegetables consumption. <sup>††</sup> Model includes pollutant, age, sex, tobacco use, physical activity, education, BMI, alcohol, place of residence, household income, diabetes history, hypertension history, chronic lung disease history, type of indoor fuel use, daily fruit and vegetables consumption. IQR PM<sub>10</sub>: 1 year: 29.60  $\mu\text{g}/\text{m}^3$  and 5 year: 28.02  $\mu\text{g}/\text{m}^3$ . IQR PM<sub>2.5</sub>: 1 year: 26.79  $\mu\text{g}/\text{m}^3$  and 5 year: 26.69  $\mu\text{g}/\text{m}^3$ . IQR PM<sub>1</sub>: 1 year: 23.70  $\mu\text{g}/\text{m}^3$  and 5 year: 22.42  $\mu\text{g}/\text{m}^3$ . IQR NO<sub>2</sub>: 1 year: 21.36  $\mu\text{g}/\text{m}^3$  and 5 year: 22.79  $\mu\text{g}/\text{m}^3$ .

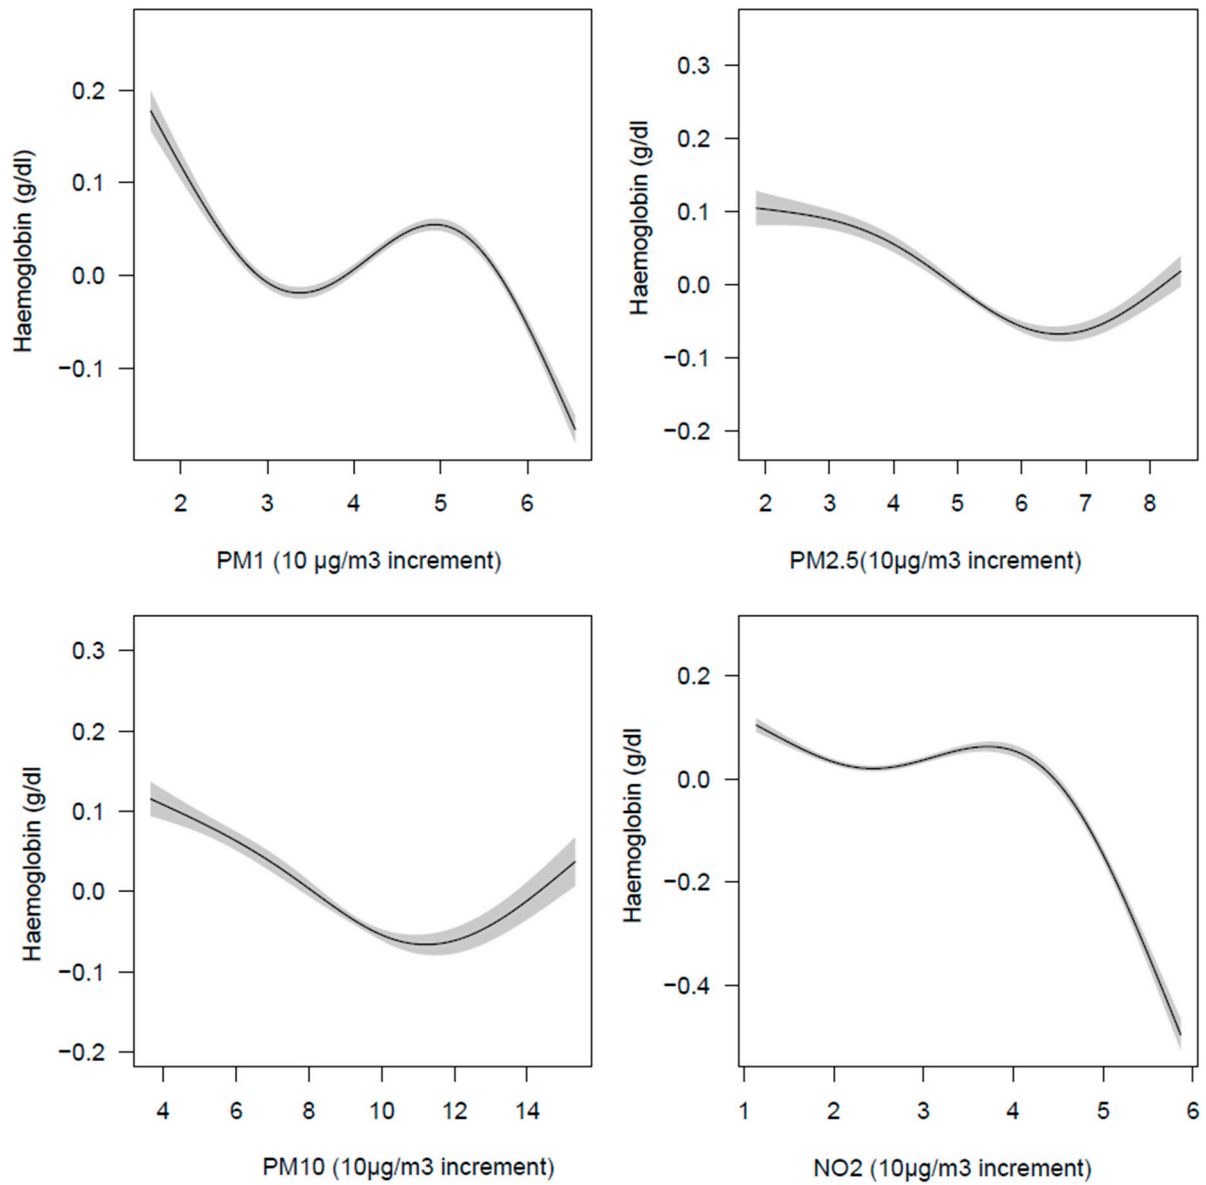

**Figure S1.** the association between a 10  $\mu\text{g}/\text{m}^3$  increase of particulate matter (PM) and NO<sub>2</sub> and decrements in haemoglobin (g/dL). The shaded region indicates 95% CIs.
